# Supplementary material for: ACE2 and TMPRSS2 Immunolocalization and COVID-19-Related Thyroid Disorder
Source: MDPI journal article supplement (doi:10.3390/biology11050697), 2022-04-30
Supplement: s1 [file s1]

**Supplementary Table S1.** Primer sequence used in real-time polymerase chain reaction (PCR).

| Gene           | Primer sequences                                                                |
|----------------|---------------------------------------------------------------------------------|
| <i>Human</i>   |                                                                                 |
| ACE2           | Forward 5'-GGGATCAGAGATCGGAAGAAGAAA-3'<br>Reverse 5'-AGGAGGTCTGAACATCATCAGTG-3' |
| TMPRSS2        | Forward 5'-CCTCTAACTGGTGTGATGGCGT-3'<br>Reverse 5'-TGCCAGGACTTCCTCTGAGATG-3'    |
| $\beta$ -actin | Forward 5'-TGCGTGACATGAGAAG-3'<br>Reverse 5'-GCTCGTAGCTTCTCCA-3'                |
| GAPDH          | Forward 5'-AAATCCCATCACCATCTTCC-3'<br>Reverse 5'-GGTTCACACCCATGACGAAC-3'        |
| <i>Rat</i>     |                                                                                 |
| ACE2           | Forward 5'-ACGAGATGGGACACATCCA-3'<br>Reverse 5'-GAAAATCGGATGGCAGAAGA-3'         |
| TMPRSS2        | Forward 5'-CACCTGCCATCCACATACAG-3'<br>Reverse 5'-CCAGAACTTCCAAAGCAAGC-3'        |
| $\beta$ -actin | Forward 5'-TGTTGCCCTAGACTTCGAGCA-3'<br>Reverse 5'-GGACC CAGGAAGGAAGGCT-3'       |
| GAPDH          | Forward 5'-CTGCACCACCAACTGCTTAC-3'<br>Reverse 5'-CAGAGGTGCCATCCAGAG-3'          |
