# Supplementary figures and images for: ACE2 and TMPRSS2 Immunolocalization and COVID-19-Related Thyroid Disorder
Source: MDPI journal article supplement (doi:10.3390/biology11050697), 2022-04-30

## <Western blot analysis>

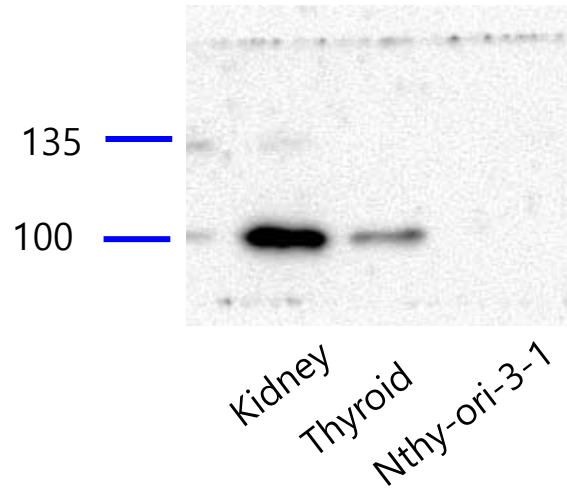

ACE2

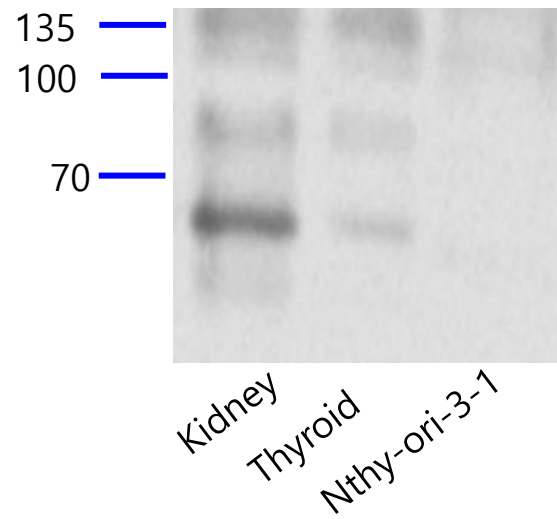

TMPRSS2

Supplement: s1 [file s1]
